1 **The non-typeable *Haemophilus influenzae* major adhesin Hia is a dual function lectin**  
2 **that binds to human-specific respiratory tract sialic acid glycan receptors.**

3

4 John M Attack<sup>1\*</sup>, Christopher J Day<sup>1</sup>, Jessica Poole<sup>1</sup>, Kenneth L. Brockman<sup>2#</sup>, Jamie R L  
5 Timms<sup>1</sup>, Linda E. Winter<sup>3</sup>, Thomas Haselhorst<sup>1</sup>, Lauren O Bakaletz<sup>2</sup>, Stephen J Barenkamp<sup>3†</sup>,  
6 and Michael P Jennings<sup>1\*</sup>

7

8 <sup>1</sup>Institute for Glycomics, Griffith University, Gold Coast, Queensland, 4222, Australia

9 <sup>2</sup>Center for Microbial Pathogenesis, The Research Institute at Nationwide Children's Hospital  
10 and The Ohio State University College of Medicine, Columbus, OH 43205, USA

11 <sup>3</sup>Department of Pediatrics, Saint Louis University School of Medicine, and the Pediatric  
12 Research Institute, Cardinal Glennon Children's Medical Center, Saint Louis, MO 63104,  
13 USA

14 # current address: Department of Microbiology & Immunology, Medical College of  
15 Wisconsin, Milwaukee, Wi, USA

16

17 **Running title:** Hia binds human-specific glycans during colonisation

18

19 \* to whom correspondence should be addressed – John M Attack or Michael P Jennings;  
20 Institute for Glycomics, Griffith University, Gold Coast, Queensland 4215, Australia, Tel:  
21 (+61) 07 56780580 (JMA) or (+61) 07 55527050 (MPJ); Fax: (+61) 07 55527050; E-mail:  
22 j.atack@griffith.edu.au or m.jennings@griffith.edu.au

23 † Deceased

24

25 This manuscript is dedicated to the memory of Dr. Stephen J. Barenkamp M.D. who passed  
26 away 17<sup>th</sup> March 2019.

27 **Abstract**

28 NTHi is a human-adapted pathogen that colonises the human respiratory tract. Strains of  
29 NTHi express multiple adhesins, however there is a unique, mutually exclusive relationship  
30 between the major adhesins Hia and HMW1/2. Approximately 25% of NTHi strains express  
31 Hia, a phase-variable autotransporter protein, and which has a critical role in colonisation of  
32 the host nasopharynx. The remaining 75% of strains express HMW1/2. Previous work has  
33 shown that the HMW1 and HMW2 proteins mediate binding to 2,3- and 2,6-linked sialic acid  
34 glycans found in the human respiratory tract. Here we show that that the high affinity binding  
35 domain of Hia, binding domain 1 (BD1) is responsible for binding to  $\alpha$ 2,6-sialyllactosamine  
36 glycans. BD1 is highly specific for glycans that incorporate the form of sialic acid expressed  
37 by humans, *N*-acetylneuraminic acid (Neu5Ac). We further show that Hia has lower affinity  
38 binding activity for 2,3-linked sialic acid and that this binding activity is mediated via a  
39 distinct domain. Thus, Hia with its dual binding activities functionally mimics the combined  
40 activities of the HMW1 and 2 adhesins. In addition, we show that Hia has a role in biofilm  
41 formation by strains of NTHi that express the adhesin. Knowledge of the binding affinity of a  
42 major NTHi adhesin, and putative vaccine candidate, will direct and inform development of  
43 future vaccines and therapeutic strategies for this important pathogen.

44 **Importance**

45 Host-adapted bacterial pathogens like NTHi have evolved specific mechanisms to colonize  
46 their restricted host niche. Relatively few of the adhesins expressed by NTHi have been  
47 characterized as regards their binding affinity at the molecular level. In this work we show  
48 that the major NTHi adhesin, Hia, preferentially binds to Neu5Ac- $\alpha$ 2,6-sialyllactosamine, the  
49 form of sialic acid expressed in humans. The receptors targeted by Hia in the human airway  
50 mirror those targeted by influenza A virus and indicates the broad importance of sialic acid  
51 glycans as receptors for airway pathogens.

52

## 53 **Introduction**

54 Non-typeable *Haemophilus influenzae* (NTHi) is a human-adapted pathogen, responsible for  
55 multiple acute and chronic infections of the respiratory tract, including otitis media (OM) (1)  
56 community acquired pneumonia (2), and chronic obstructive pulmonary disease (COPD)  
57 exacerbations (3). Each year there are 31 million new cases of the most severe form of OM,  
58 chronic suppurative OM, are diagnosed (4), 60% of whom suffer an associated hearing loss.  
59 Globally, there are over 700 million cases of acute OM every year (4); in the USA alone,  
60 each year there are ~25 million episodes of acute OM, >13 million antibiotic prescriptions,  
61 and public health costs estimated at \$3- \$5 billion (5, 6). According to WHO estimates,  
62 approximately 65 million people have moderate to severe COPD. Over 3 million people died  
63 of COPD in 2005, which corresponded to 5% of all deaths globally (7). Invasive disease  
64 caused by NTHi has increased significantly in recent years, in part due to vaccines against  
65 *Haemophilus influenzae* type b, and *Streptococcus pneumoniae* (8). At present, there is no  
66 effective vaccine against NTHi.

67 NTHi is commonly carried the human nasopharynx asymptotically. Many bacterial  
68 pathogens express outer-surface proteins that target specific host molecules to allow them to  
69 adhere to and persist in specific niches in the host. Examples of bacterial adhesins  
70 recognising particular host proteins include the type IV pilus of *Neisseria gonorrhoeae*,  
71 which recognises host integrins (9); the type IV pilus of NTHi, which recognizes ICAM1  
72 (10); the curli pili of *Salmonella enterica*, which binds host TLR2 receptors; and the FimH  
73 protein of uropathogenic *Escherichia coli*, which binds to mannosylated glycoproteins (11).  
74 Many bacteria also express virulence factors that belong to the auto-transporter protein  
75 family. These proteins have a diverse array of functions including adhesion to host surfaces  
76 (12). Auto-transporter proteins are characterised by a large barrel-like C-terminal domain  
77 which inserts into the outer-membrane, forming a pore through which the N-terminal effector

78 portion passes to reach the extracellular environment (13, 14). NTHi express many  
79 autotransporter proteins (15) that fulfil a variety of roles in NTHi pathobiology. One of these  
80 autotransporters, Hia, is an adhesin that is expressed by approximately 25% of NTHi strains  
81 (16). The remaining ~75% of NTHi strains express the HMW1/2 proteins (17), which have  
82 previously been demonstrated to be involved in adhesion of NTHi to human cells (18). It is  
83 unclear why strains encode genes for Hia or HMW but never both. The HMW1 protein binds  
84 to host cell glycans as cellular receptors, specifically  $\alpha$ 2,3-sialyllactosamine (2-3 SLN) (19).  
85 We recently demonstrated that HMW2, which is ~65% identical to HMW1, binds the related  
86 glycan  $\alpha$ 2,6-sialyllactosamine (2-6 SLN), with high specificity for 2-6 SLN containing *N*-  
87 acetylneuraminic acid (Neu5Ac), the form of sialic acid expressed by humans (20).  
88 Intriguingly, 2-3 SLN is found mainly in the lower human respiratory tract, whereas 2-6 SLN  
89 is found throughout the entire respiratory tract, but predominates in the upper airway (21). It  
90 has previously been demonstrated that Hia is required for adherence to Chang epithelial cells  
91 (22), and we have demonstrated that Hia is required for colonisation of the host nasopharynx  
92 (23). However, the cellular receptor for Hia is currently unknown. We hypothesized that Hia  
93 may also recognize host-specific glycans found in the human respiratory tract. In the current  
94 study we present an investigation to identify and characterized the Hia cellular receptor.

95

## 96 **Results**

97 *Hia is a lectin that recognizes Neu5Ac- $\alpha$ 2,6-lactosamine (2-6 SLN-Ac) with high affinity.*

98 In order to determine whether Hia had glycan binding activity, we cloned and over-expressed  
99 Hia from NTHi strain R2866, in *E. coli* BL21. Heterologous over-expression of Hia in *E. coli*  
100 was used previously to investigate Hia binding activity (22). Hia over-expression was  
101 confirmed by Western blot and whole cell ELISA (Supplementary Figure 1). The glycan  
102 binding ability of *E. coli* strain BL21 cells expressing Hia (BL21-Hia) was compared to wild

103 type BL21 cells, using glycan array analysis. The background binding of BL21 only was  
104 subtracted from BL21-Hia in order to deduce the glycans bound in an Hia-dependent manner.  
105 A subset of the identified glycans were characterised for their binding affinity to BL21-Hia  
106 using surface plasmon resonance (SPR; Table 1). These studies demonstrated that Hia bound  
107 to a number of sialylated glycans, with the greatest affinity for Neu5Ac- $\alpha$ 2,6-lactosamine (2-  
108 6 SLN-Ac), with a disassociation constant ( $K_D$ ) of 185 nM. A comparison of the binding  
109 affinity of Hia to matched glycan pairs containing either a terminal *N*-acetylneuraminic acid  
110 (Neu5Ac; the only form expressed in humans) or *N*-glycolylneuraminic acid (Neu5Gc; which  
111 is expressed in most mammals), showed that Hia preferentially binds to structures containing  
112 a terminal Neu5Ac (Table 1), with a ~7-fold preference for 2,6-SLN-Ac over Neu5Gc- $\alpha$ 2,6-  
113 lactosamine (2,6 SLN-Gc) (185 nM vs 1.39  $\mu$ M; Table 1). Whilst some binding to 2,3 SLN-  
114 Ac (2.03  $\mu$ M; Table 1) was observed, this occurred with approximately 11-fold lower affinity  
115 than for 2-6 SLN-Ac (185 nM).

116

117 *Modelling shows key interactions between BD1 residues D618 and A620 and the Neu5Ac*  
118 *moiety of 2-6 SLN-Ac*

119 The Hia protein has previously been shown to contain high- and low-affinity host cell  
120 binding domains (BD) termed BD1 and BD2 respectively (22, 24). BD1 and BD2 are  
121 proposed to bind a common, but unknown cellular receptor (24). Hia BD1 consists of amino  
122 acids 541-714 inclusive (22), with residues in the BD1 shown to be essential for binding to  
123 Chang epithelial cells when Hia is expressed in *E. coli* (22). To determine the molecular basis  
124 of the interactions between Hia BD1 and 2-6 SLN-Ac, we carried out molecular docking  
125 studies using the previously published Hia BD1 structure (22). All docking structures of 2-6  
126 SLN-Ac with HiaBD1 indicated interaction of the ligand at the interface of chain A and chain  
127 C of HiaBD1. Figure 1 shows a bound structure of 2-6 SLN-Ac that represents a sialic acid-

128 specific binding mode with the negatively charged carboxylate group of the Neu5Ac residue  
129 engaging in strong electrostatic interaction with R674. The glycerol side chain of the sialic  
130 acid moiety of 2-6 SLN-Ac plays an important role as it engages in hydrogen bonds with  
131 D618 and A620. Importantly, the high flexibility of the  $\alpha(2-6)$ -linkage of 2-6 SLN-Ac allows  
132 the coordination of the lactosamine disaccharide moiety. In addition, our docking studies  
133 indicate that residue R674 is involved in coordinating 2-6 SLN-Ac in all potential 25 docked  
134 conformations.

135

136 *Hia BD1 is the site of high affinity interactions with the cellular receptor 2-6 SLN-Ac.*

137 Using purified Hia BD1 (aa 514-714 inclusive) (22) we investigated BD1 binding specificity  
138 using SPR. Table 1 shows that Hia BD1 binds with high affinity and specificity to 2-6 SLN-  
139 Ac, with a  $K_D$  of  $64.9 \text{ nM} \pm 5.6$ . This value is in a similar range to the affinity we observe  
140 with full-length Hia ( $185 \text{ nM} \pm 59.9$ ). Hia BD1 interacts with 2-6 SLN-Gc with  $\sim 1000$  lower  
141 affinity ( $61.28 \text{ } \mu\text{M} \pm 9.1$ ; see Table 1) than with 2-6 SLN-Ac. In order to determine the  
142 specific region of BD1 responsible for the interaction with 2-6 SLN-Ac, we constructed a  
143 peptide library of BD1 aa 541-714, consisting of peptides of 15 amino acids in length,  
144 overlapping consecutive peptides by 10 aa each (for example, peptide one consisted of  
145 residues 541-555; peptide two of residues 546-560, etc; Table 2). We used these peptides to  
146 block the interaction between BL21-Hia and 2-6 SLN-Ac using an SPR competition assay.  
147 Using this methodology, we show that a peptide comprised of twenty amino acid residues  
148 containing both D618 and A620 (p16+17; residues 616-635) blocks 100% of the interaction  
149 between BL21-Hia and 2-6 SLN-Ac (Table 2). Peptide 16 and Peptide 17 individually result  
150 in blocking of 95% and 85% of interactions, respectively, between BL21-Hia and 2-6 SLN-  
151 Ac (Table 2). Peptides flanking the region of 16+17 (peptide 15 = aa 611-625; peptide 18 =  
152 626-640; Table 2) only block  $\sim 50\%$  of interactions, with no other peptide 15mer of BD1

153 blocking interactions between BL21-Hia and 2-6 SLN-Ac (data not shown). Residues D618  
154 and A620 were previously shown to be key for binding to host cells, as when these residues  
155 were mutated (D618K and A620R), binding was lost (22). Our blocking studies provide  
156 strong evidence that additional residues, and likely secondary structure around these residues  
157 that can only form in the 20mer p16+17, mediate direct interaction between 2-6 SLN-Ac and  
158 Hia, leading to high-affinity binding.

159 In order to confirm these findings, we generated recombinant Hia with the single mutations  
160 D618K and A620R, and a double mutant of Hia lacking both of these residues  
161 (D618K/A620R double). SPR analysis was used to compare the binding of this panel of Hia  
162 mutants with wild type Hia and BD1, using the same subset of glycans (see Table 3). These  
163 findings demonstrated that the A620R Hia mutant and the D618K/A620R Hia double mutant  
164 (all located in BD1) completely lose the ability to bind 2-6 SLN-Ac, while still maintaining  
165 binding to 2-3 SLN-Ac. Collectively, these data demonstrated that the binding site of 2-3  
166 SLN-Ac is not BD1, and confirmed the role of BD1 in binding specificity to 2-6 SLN-Ac.

167

#### 168 *Hia is involved in interactions between NTHi and epithelial cells*

169 In order to demonstrate a biological role for Hia in attachment of NTHi to host epithelium,  
170 we performed adherence assays using Chang epithelial cells. Prior to carrying out these  
171 adherence assays, we confirmed 2-6 SLN was localized on the surface of these cells using  
172 Dylight 649 Conjugated SNA, a lectin specific for 2-6 SLN (Figure 2A). Following treatment  
173 with sialidase to remove sialylated glycans, 2-6 -SLN was no longer detected on the cell  
174 surface by SNA (Figure 2A). Using NTHi strain R2866 that expressed Hia (wild type R2866;  
175 R2866 *hia+*), and an isogenic mutant lacking Hia (R2866 *hia::tet*), we showed that the ability  
176 of NTHi to adhere to Chang cells decreased when NTHi lacked Hia. Wild type R2866 is



177 unable to bind Chang cells treated with sialidase, which removes sialylated glycan structures  
178 (Figure 2B).

179

180 *Residues D618 and A620 are critical to the interaction of Hia with Chang cells*

181 In order to determine the contribution of the key 2-6 SLN-Ac interacting residues (D618,  
182 A620), and residue R674, indicated as important from our modelling studies, we carried out  
183 adherence assays using a Chang epithelial cell model (23) to determine relative adherence of  
184 *E. coli* BL21 strains expressing wild type (wt) Hia and our panel of Hia point mutants.  
185 Adherence of *E. coli* BL21 cells to Chang cells was significantly greater when cells  
186 expressed wt Hia (14.44% adherence, Figure 3) compared to control cells that did not express  
187 Hia (empty BL21; 1.26% adherence;  $P = 0.0007$ ). BL21 that express the Hia D618K/A620R  
188 double mutant exhibited an approximately 4.5-fold decrease in relative adherence (3.21%  
189 adherence;  $P = 0.002$ ) compared to BL21 that express wt Hia. BL21 that expressed Hia  
190 R674A, showed an approximate 2-fold decrease in relative adherence compared to cells that  
191 express wt Hia (8.4% adherence), but this was not statistically significant compared to cells  
192 expressing wt Hia ( $P = 0.06$ ). These data indicated that the interaction between Hia and 2-6  
193 SLN-Ac is critical to bacterial interactions with epithelial cells, and demonstrate the key  
194 contribution of residues D618 and A620 of Hia BD1 in mediating this interaction.

195

196 *Expression of Hia in NTHi results in larger more robust biofilms by strains where the hia*  
197 *gene is present*

198 The role of Hia in biofilm formation by two NTHi strains (R2866 and strain 11; both  
199 encoding the *hia* gene) was tested using our well defined static biofilm model for NTHi (25).  
200 Biofilms were formed for 24 hours at 37°C. Both strain R2866 and strain 11 formed much  
201 larger biofilms when Hia was expressed (*hia+*) compared to when it was absent, as assessed

202 by confocal microscopy (Figure 4). NTHi that expressed Hia (*hia+*) formed biofilms with  
203 significantly more biomass ( $P = <0.0001$  strain R2866 Figure 4A;  $P = <0.01$  strain 11; Figure  
204 4B) and were significantly thicker ( $P = <0.0001$  strain R2866 Figure 4A;  $P = <0.05$  strain 11;  
205 Figure 4B) compared to those formed by strains that did not express Hia (*hia::tet*).  
206 Descriptively, biofilms formed by NTHi that expressed Hia were significantly denser, and  
207 had a lawn-like architecture, compared to those formed by the respective isogenic mutant  
208 strain that did not express Hia. Biofilms of the two *hia::tet* isogenic mutant strains were  
209 significantly rougher (e.g. had a greater difference in overall surface height and topography)  
210 with dense tower-like regions of bacteria surrounded by open water channels (indicated by  
211 black in the representative top-down images) (Figure 4). The differences in bacterial  
212 distribution within the biofilm are apparent from the area occupied by layer (AOL) graphs  
213 (Figure 4). The area occupied by layer is a calculation of the amount (or percentage) of  
214 bacterial biomass that is present within each 1- $\mu\text{m}$  optical section of the biofilm taken from  
215 the base of the biofilm to the top. These data are plotted wherein the layer closest to the glass  
216 surface is at the bottom of the y axis and the top of the biofilm (farthest from the surface) is at  
217 the top of the y axis. The relative shift of the blue lines to the right and upward, compared to  
218 the red lines (Figure 4), indicated that biofilms formed by NTHi that express Hia are  
219 substantially taller and more-dense than those formed by NTHi that do not express Hia.  
220 These results indicated that the Hia adhesin was a critical determinant of biofilm structure  
221 and organization in these strains, possibly due to increased inter-bacterial associations.

222

## 223 **Discussion**

224 In this work, we have demonstrated that the NTHi adhesin Hia is a lectin, with high  
225 specificity for host-specific glycans. Hia mediates high-affinity binding to 2-6 SLN-Ac.  
226 Molecular modelling studies using the crystal structure of Hia BD1 (22) in complex with 2-6

227 SLN-Ac showed that Hia residues D618 and A620, and to some extent R674, were critical to  
228 this interaction. We experimentally confirmed our modelling using a diverse and  
229 comprehensive array of complementary *in vitro* studies. Using a combination of *E. coli*  
230 expressing Hia, purified HiaBD1, and a peptide library derived from BD1, we determined  
231 that residues D618 and A620 of Hia are required for the high affinity interaction between Hia  
232 and 2-6 SLN-Ac. Interestingly, our SPR data also confirmed that Hia recognises 2-3 SLN-  
233 Ac, but this interaction was approximately 10-fold lower than that for 2-6 SLN-Ac. However,  
234 using the HiaBD1 protein, we confirmed that the interaction of Hia with 2-3 SLN-Ac is not  
235 mediated by BD1, which is consistent with previous findings which proposed that Hia  
236 contains two binding domains (22). Therefore, contrary to previous work which stated that  
237 BD1 and BD2 bind the same ligand (24), we have shown that the two binding domains of  
238 Hia interact with distinct ligands; BD1 with 2-6 SLN-Ac and BD2 with 2-3 SLN-Ac.  
239 Moreover, in both cases, the preference is for the form of sialic acid expressed by humans  
240 (Neu5Ac). This offers an insight into the evolution of NTHi as a human-specific pathogen:  
241 although Neu5Gc and Neu5Ac (the precursor to Neu5Gc) can be expressed by most  
242 mammals, humans only make Neu5Ac linked glycans, due to a mutation in the CMAH gene  
243 responsible for the conversion of Neu5Ac to Neu5Gc (26). As it appears that Hia  
244 preferentially binds Neu5Ac linked glycans over Neu5Gc linked glycans, this finding  
245 strongly suggests that Hia has evolved to preferentially bind glycans most likely to be present  
246 in its human host. Preference for the Neu5Ac form of sialic acid has also been observed in  
247 the utilisation of Neu5Ac for macromolecular biosynthesis of bacterial cell surface glycans in  
248 NTHi (27), which further supported the central role of sialic acid in the adaptation of NTHi to  
249 its human host.

250 NTHi strains that do not possess the gene encoding *hia* instead encode genes for and express  
251 the adhesins HMW1 and HMW2 (18). Previous work has demonstrated that NTHi strains

252 either encode genes for Hia or HMW1/2, but never both, with approximately 75% strains  
253 expressing HMW1/HMW2, and the remaining 25% expressing Hia. We have recently  
254 demonstrated that HMW2 preferentially binds 2-6 SLN-Ac (20), whereas HMW1 has a  
255 preference for 2-3 SLN structures (19). However, HMW1 showed no preference for either  
256 Neu5Ac or Neu5Gc containing structures, and had a much lower affinity than HMW2 for 2-6  
257 SLN-Ac (20). Therefore two distinct NTHi adhesins, Hia and HMW1/2, that show a discrete  
258 lineage distribution in the NTHi population, have evolved to bind the same subset of glycans:  
259 Hia binds 2-6 SLN-Ac preferentially over 2-3 SLN-Ac; HMW2 specifically binds 2-6 SLN-  
260 Ac; HMW1 binds a broader range of 2-3 and 2-6 linked glycan structures compared to  
261 HMW2, but with lower overall affinity (Figure 5). Production of both 2-6 SLN-Ac and 2-3  
262 SLN-Ac linked glycan structures is found throughout the human airway, but these receptors  
263 are not evenly distributed throughout the upper and lower airway; 2-6 SLN-Ac is found in  
264 both the upper and lower respiratory tract, while 2'-3' SLN-Ac linked glycans are found  
265 predominantly in the lower respiratory tract (28-30). Thus, NTHi strains that express Hia or  
266 HMW1/2 are able to adhere to the entire human respiratory tract. It would be interesting to  
267 study the distribution of NTHi strains expressing only HMW1 or HMW2 – based on their  
268 differing binding affinities, it may be that HMW2-only expressing strains are more prevalent  
269 in upper respiratory tract infections, whereas HMW1-only expressing strains are more  
270 disposed to infecting the lower respiratory tract. It is also intriguing to note that the binding  
271 specificity of Hia (and HMW1/2) mirrors perfectly that of human influenza A viruses (31-  
272 33), indicating that specificity for human specific glycans has evolved in both viral and  
273 bacterial human-adapted airway pathogens. A common strategy to block these interactions  
274 may therefore serve as a general therapy for both these types of infection. It is well known  
275 that infection with the influenza virus predisposes individuals to colonization and infection  
276 by *Streptococcus pneumoniae*; although there are likely multiple aspects behind the increased

277 severity of pneumococcal disease following influenza virus infection (34), it is thought that  
278 desialylation of the host epithelia by the viral neuraminidase allows for more efficient  
279 colonization by the pneumococcus (35). This desialylation in turn increases the susceptibility  
280 of these patients to pneumococcal pneumonia following influenza virus infection. The  
281 lethality of the 1918 ‘Spanish flu’ outbreak was mainly due to secondary infections by  
282 bacterial pathogens, including both *S. pneumoniae* and *H. influenzae*, with up to 95% of the  
283 deaths from this pandemic attributable to secondary bacterial infections (36, 37). Thus, the  
284 sharing of common receptors indicates the possibility of direct interaction between influenza  
285 virus and NTHi occurs during co-infection, and may provide a fruitful area of investigation in  
286 the study of the dynamics of this polymicrobial interaction.

287 As well as playing a key role in host colonisation through recognition of human specific  
288 glycan structures, we have demonstrated that Hia also plays a key role in biofilm formation  
289 by NTHi. Biofilm formation by NTHi has been shown to increase the resistance of bacteria to  
290 antibiotics (38), and killing by neutrophils (39) when compared to planktonic counterparts.  
291 Increased resistance of bacteria within biofilms to antibiotics has been demonstrated for a  
292 number of major human pathogens, such as *Pseudomonas aeruginosa* (40) and  
293 *Staphylococcus aureus* (41). Biofilm formation also plays a key role in NTHi disease  
294 pathologies, such as middle ear infections (42) and exacerbations of cystic fibrosis (43).  
295 Using two diverse strains of NTHi, we showed that Hia is a critical determinant of biofilm  
296 development and structure and that the potential to block Hia function through knowledge of  
297 its specific binding affinities could play a key role in targeting biofilm formation during  
298 disease caused by NTHi.

299 To summarize, we have provided an in-depth characterization of the binding affinity  
300 of the NTHi adhesin Hia, by determining the major human cellular receptors it has evolved to  
301 bind and by demonstrating the molecular basis of these interactions. We also demonstrate

302 that Hia has a role in biofilm formation by NTHi, and therefore likely contributes to  
303 antibiotic resistance and chronicity by this mechanism. Knowledge of the factors required by  
304 NTHi to colonise and cause disease will be key to developing both vaccines and treatments  
305 against this organism. Our demonstration that the major NTHi adhesins HMW1 and HMW2  
306 bind the same host glycans as Hia (20), and that these adhesins are expressed by nearly 100%  
307 of NTHi strains is a key step towards the development of a rationally designed vaccine  
308 against NTHi, and to the production of novel treatments against this pathogen.

309

## 310 **Materials and methods**

### 311 *Bacterial strains and growth conditions*

312 NTHi strains expressing Hia have been described previously [R2866 (44) and strain 11 (45)].  
313 NTHi strains were routinely grown in Brain-Heart Infusion (BHI) broth supplemented with  
314 1% hemin and 20  $\mu\text{g NAD}^+$ /mL (sBHI), and grown aerobically at 37°C with 150 rpm  
315 shaking. For solid media, 1.5% agar was added to sBHI broth. sBHI media were  
316 supplemented with tetracycline (5  $\mu\text{g}/\text{mL}$ ) as required. Plates were grown at 37°C in  
317 atmosphere containing 5%  $\text{CO}_2$ . *Escherichia coli* were grown using Luria-Bertani (LB)  
318 media at 37°C, and supplemented with tetracycline (5  $\mu\text{g}/\text{mL}$ ) as required.

319

### 320 *Generation of a hia knockout mutant in NTHi strains R2866 and 11*

321 A region of NTHi R2866 chromosome containing the *hia* promoter and the ATG start and  
322 5' region of the gene were generated by PCR using primer pair hia-UP-F / hia-UP-R, and  
323 cloned into pGEM Teasy according to manufacturer's instructions (Promega) to generate  
324 plasmid vector Teasy::hiaUP. Inverse PCR was used to linearise this vector at the *hia* start  
325 codon using primers hia-INV-F / hia-INV-R. A tetracycline resistance cassette, encoding  
326 *tetM*, was generated from plasmid vector pGEM-TetM(B) using M13F and M13R primers.

327 This was cloned into the linearised Teasy::hiaUP vector so the gene was in the same  
328 orientation as the *hia* gene, and orientation confirmed using PCR and sequencing. This vector  
329 was designated Teasy::hiaUP::TetM. Following linearization with NgoMIV (New England  
330 Biolabs), DNA was transformed into NTHi strains R2866 and strain 11 using the MIV  
331 method (46). Transformants were selected on BHI media containing 5 µg tetracycline /mL,  
332 and positive colonies confirmed by sequencing and Western blotting using an anti-Hia  
333 monoclonal antibody 1F4 (47). Strains were designated as R2866 or strain 11 *hia::tet*.

334

### 335 *Cloning and over-expression of full length Hia in E. coli*

336 Primers HiaFULL-F and HiaFULL-R (Supplementary Table 1) were used to amplify full  
337 length wild-type *hia* (R2866\_0725) including the signal sequence (residues 1-49) from  
338 genomic DNA prepared from NTHi strain R2866. PCR was carried out using KOD hot-start  
339 polymerase (EMD Millipore) according to manufacturer's instructions. Following digestion  
340 with BspHI and XhoI (NEB) and clean up, DNA was cloned into pET15b digested with NcoI  
341 and XhoI. the resulting plasmid was designated pET15b::Hia. Following confirmation of  
342 correct clones by sequencing, over-expression was carried out in *E. coli* BL21 following by  
343 inducing cells with 0.5 mM IPTG overnight at 37°C with 200 rpm shaking. Over-expression  
344 was confirmed by Western blot as previously described (23) using anti-Hia monoclonal  
345 antibody 1F4 (47). Whole cell ELISA using standard methods (48) with modifications as  
346 previously described (23) and starting with 1:10,000 dilution of primary antibody anti-Hia  
347 monoclonal antibody 1F4 confirmed the location of Hia at the cell surface.

348

### 349 *Generation of Hia point mutants for over-expression*

350 Inverse PCR was carried out using primer pairs designed to introduce point mutations as  
351 previously described and used here to abrogate binding of *E. coli* expressing Hia to Chang

352 cells (22). D618K, A620A and a 618/620 double mutant were generated using specific  
353 forward primers Hia-D618K-F, Hia-A620R-F, or Hia-618/620-double-F and common reverse  
354 primer Hia-618/620-R. A R674A mutant was generated using primer pair Hia-R674A-F and  
355 Hia-R674A-R. All inverse PCR reactions were carried out using KOD hot-start polymerase  
356 (EMD Millipore) according to manufacturer's instructions, and a plasmid mini-prep (Qiagen)  
357 of pET15b::Hia as template. All primer sequences are listed in Supplementary Table 1.  
358 Clones were sequenced using primers either side of the point mutation Hia-screen-F and Hia-  
359 screen-R using BigDye 3.1 according to manufacturer's instructions (Thermo Fisher), and  
360 sequenced at Australian Genome Analysis Facility (AGRF, Brisbane, Australia). Over-  
361 expression was carried out as described above for Hia wild-type, and cell surface localization  
362 confirmed using whole cell ELISA as above.

363

#### 364 *Over-expression and purification of Hia BD1*

365 Primers to clone Hia binding domain 1 (BD1; amino acid residues 540-714) were designed  
366 based on those from (22). HiaBD1-F and HiaBD1-R were used to amplify BD1 from NTHi  
367 strain R2866 genomic DNA using KOD hot-start polymerase (EMD Millipore) according to  
368 manufacturer's instructions. Following digestion with NdeI and BamHI (NEB) and clean up,  
369 DNA was cloned into pET15b digested with the same enzymes. This strategy would clone  
370 the gene in frame with an N-terminal 6xHis tag for purification. The resulting plasmid was  
371 designated pET15b::HiaBD1. Over-expression was carried out in *E. coli* BL21 following by  
372 inducing cells with 0.5 mM IPTG overnight at 37C with 200 rpm shaking. Cells were  
373 pelleted, resuspended in 1x binding buffer (50 mM NaPO<sub>4</sub>, 300 mM NaCl, pH7.4), lysed  
374 using 0.1 mm glass beads and a Tissue lyser (Qiagen) for 30 mins at 50 osc<sup>-1</sup> min<sup>-1</sup>.  
375 Purification was carried out using TALON gravity flow resin in 1x binding buffer. Protein  
376 was eluted from the resin using step wise concentrations of imidazole in 1x binding buffer



377 (10-500mM imidazole), fractions analysed by SDS PAGE, and fractions containing pure  
378 BD1 pooled and concentrated using centrifugal concentrators (Millipore, 10kDa cut-off).  
379 Pure concentrated BD1 was buffer exchanged into 1x phosphate buffered saline (1x PBS)  
380 using the same centrifugal concentrators. Protein was analysed by SDS PAGE, and quantified  
381 using an extinction coefficient of  $8480 \text{ M}^{-1} \text{ cm}^{-1}$  and MW of 20471.43 Da (based on the  
382 sequence of Hia BD1+6xHis tag)

383

#### 384 *Glycan array*

385 Glycan array slides were printed using OPEpoxy (CapitalBio) activated substrates with the  
386 glycan library as previously described (49) using an ArrayIt Spotbot Extreme 3 contact  
387 printer with solid metal pins. The glycan array binding experiments were performed and  
388 analysed as previously described (50). Briefly, 1 mL of OD<sub>600</sub> 0.2 *E. coli* BL21 with  
389 heterologous expression of Hia wild-type or Hia point-mutants in PBS were incubated with  
390 15µL of 50 µM Bodipy methylester for 15 minutes, centrifuged at 900g for 3 minutes and the  
391 pellet washed 3 times with PBS to removed excess dye. The cell pellet was resuspended in 1  
392 mL of array PBS (1x PBS containing 1 mM CaCl<sub>2</sub> and 1 mM MgCl<sub>2</sub>) and 300 µL was  
393 applied to the slide in a 65 µL gene frame without a coverslip. Slides were washed three  
394 times for 2 minutes in array PBS, dried by centrifugation and scanned and analysed using the  
395 Scan Array Express software package (Perkin Elmer) and Microsoft Excel for statistical  
396 analysis. Binding of Hia was defined as both above the background of the slide (cut off of  
397 550 fluorescence units) and 2-fold and significantly ( $p < 0.05$ ) above the background of empty  
398 vector BL21 binding to the array by Student's unpaired t-test of fluorescence of BL21 empty  
399 vector controls versus Hia expressing strains of BL21. All glycan array binding data is  
400 presented in Supplementary Table 2 and the MIRAGE compliant information is listed in  
401 Supplementary Table 3.

402

403 *Surface Plasmon Resonance (SPR)*

404 Surface plasmon resonance (SPR) experiments of the full length wild-type Hia expressed on  
405 the surface of *E. coli* BL21 was performed using a GE Biacore T100 system and a Series S  
406 C1 sensor chip using a modification of methods previously described (51, 52). *E. coli* (BL21  
407 strains expressing full length wild-type Hia, point mutants, or BL21 only) cells at  $1 \times 10^6$   
408 bacteria/mL were immobilised to the chip surface following the C1 NHS/EDC method  
409 template with a contact time of 900 seconds at a flow rate of 5  $\mu$ L/minute in 10 mM sodium  
410 acetate pH 5.5. Interaction of glycans with the bacteria was performed using five-fold serial  
411 dilutions with maximum concentration of 20  $\mu$ M on first analysis and 5  $\mu$ M when affinities  
412 were better defined using single cycle kinetics in 1x PBS pH 7.4 at 20  $\mu$ L/minute with 60  
413 second contact time and a final dissociation time of 10 minutes. A blank ethanolamine  
414 immobilisation was used as a control flow cell and 1x PBS pH 7.4 was used as the zero-  
415 concentration control. Regeneration of the bacterial surface was performed by flushing 10  
416 mM Tris 1mM EDTA over the surface for 5 minutes at 30  $\mu$ L/minute. Affinities ( $K_D$ ) were  
417 determined using the Biacore T100 evaluation software analysis of double baseline  
418 subtracted data. All interactions were measured in triplicate and displayed plus/minus 1  
419 standard deviation of the measured mean.

420 Purified Hia BD1 protein was immobilised onto a CM5 sensor chip amine capture on a  
421 Biacore T100 with a contact time of 600 seconds at a flow rate of 5  $\mu$ L/minute in 10 mM  
422 sodium acetate pH 4.5. Glycans were run at the optimised concentrations outlined above.

423 With the analysis performed as outlined above.

424 Peptide binding region identification was performed using a modified version of a previously  
425 described method (53), competition assays using immobilised Hia expressing cells and  
426 flowed peptides and glycan. *E. coli* BL21 expressing full-length wild-type Hia were

427 immobilised onto a H1 sensor chip using a ForteBio Pioneer using a contact time of 720  
428 seconds at a flow rate of 10  $\mu\text{L}/\text{minute}$  in 1x PBS at  $1 \times 10^8$  bacteria/mL Assays were set up  
429 using the NextStep injection feature as previously described (54, 55) with combinations of  
430 2,6-SLN, Hia overlapping peptides and PBS as the negative control used to determine the Hia  
431 region that interacted with 2,6-SLN. Analysis was performed using the QDat analysis  
432 software package.

433

#### 434 *Distribution of 2,6-SLN on Chang cells*

435 Chang cells ( $1 \times 10^4$  cells) in 100  $\mu\text{L}$  total volume were seeded into Transwell inserts with a  
436 6.5 mm diameter and 0.4  $\mu\text{m}$  pore size (Corning Incorporated, Corning, New York). Cell  
437 culture medium (DMEM, 10% heat-inactivated calf serum, 2 mM L-glutamine) was replaced  
438 daily until cells reached confluence, 2 to 3 days. The apical surface of the cells was rinsed  
439 twice with sterile DPBS and then incubated with 0.1 units of neuraminidase (Sigma) in 100  
440  $\mu\text{L}$  DPBS or with DPBS alone for 2 hours at  $37^\circ\text{C}$ . The cells were then rinsed twice with  
441 DPBS and 100  $\mu\text{L}$  of 10  $\mu\text{g}/\text{mL}$  Dylight 649 Conjugated *Sambucus nigra* (EY Laboratories,  
442 San Mateo, California) was added to the apical surface and incubated for 15 minutes. The  
443 cells were rinsed twice with DPBS, incubated with 3 units of Alexa Fluor™ 594 Phalloidin  
444 (Thermo Fisher Scientific, Waltham, Massachusetts) for 30 minutes and rinsed twice. The  
445 membrane of the Transwell was excised and then mounted with ProLong™ Glass Antifade  
446 Mountant with NucBlue™ Stain (Thermo Fisher Scientific, Waltham, Massachusetts).  
447 Images were captured on a LSM 700 laser scanning microscope and rendered with Zeiss Zen  
448 software (Zeiss).

449

#### 450 *Biofilm formation*

451 Biofilms were formed by NTHI cultured within chambers of eight-well-chambered  
452 coverglass slides (Thermo Scientific, Waltham, MA) as described previously (56). Briefly,  
453 mid-log phase cultures of NTHI strains were diluted with sBHI. NTHI were inoculated at  $4 \times$   
454  $10^4$  c.f.u. in 200  $\mu$ l total volume per well and slides were incubated at 37°C with 5%  
455 atmospheric CO<sub>2</sub>. Biofilms were grown for a total of 24 h, with the growth medium replaced  
456 after 16 h. To visualize, biofilms were stained with LIVE/DEAD BacLight stain (Life  
457 Technologies) and fixed overnight in fixative (1.6% paraformaldehyde, 2.5% glutaraldehyde,  
458 4% acetic acid in 0.1 M phosphate buffer, pH 7.4). Fixative was replaced with saline before  
459 imaging with a Zeiss 510 Meta-laser scanning confocal microscope. Images were rendered  
460 with Zeiss Zen software.

461

#### 462 *Analysis of biofilm formation and architecture*

463 Z-stack images acquired at 63x with a Zeiss 510 Meta-laser scanning confocal microscope  
464 were analyzed by COMSTAT2 to determine biomass ( $\mu\text{m}^3/\mu\text{m}^2$ ), average thickness ( $\mu\text{m}$ ),  
465 roughness (Ra) and percent area occupied by layers. Area occupied by layer was plotted as  
466 percent bacterial biomass coverage per 1  $\mu\text{m}$  optical section from the base of the biofilm.  
467 Standard error of the mean for replicate biofilms was calculated for each individual layer  
468 with GraphPad Prism version 6.0 (GraphPad Software, San Diego, CA).

469

#### 470 *Adherence of NTHI strain R2866 to Chang cells*

471 Chang cells ( $1 \times 10^4$  cells) in 100  $\mu$ L total volume were seeded into Transwell inserts with a  
472 6.5 mm diameter and 0.4  $\mu\text{m}$  pore size (Corning Incorporated, Corning, New York). Cell  
473 culture medium (DMEM, 10% heat-inactivated calf serum, 2 mM L-glutamine) was replaced  
474 daily until cells reached confluence, 2 to 3 days. The apical surface of the cells was rinsed  
475 twice with sterile DPBS. Strain R2866 strains were added to the apical surface of the Chang

476 cells at an MOI of 100 in 50  $\mu$ L of DPBS and incubated for 30 minutes at 37°C. The cells  
477 were rinsed twice with DPBS, incubated with 3 units of Alexa Fluor™ 594 Phalloidin  
478 (Thermo Fisher Scientific, Waltham, Massachusetts) for 30 minutes and rinsed twice. The  
479 membrane of the Transwell was then excised and mounted with ProLong™ Glass Antifade  
480 Mountant with NucBlue™ Stain (Thermo Fisher Scientific, Waltham, Massachusetts).  
481 Images were captured on a LSM 700 laser scanning microscope and rendered with Zeiss Zen  
482 software (Zeiss).

483

#### 484 *Adherence assays with BL21 strains*

485 *E. coli* BL21 strains expressing either wild-type Hia, D618K/A620R double mutant, R674A  
486 mutant, or containing the empty pET15b expression vector were grown to mid-log ( $OD_{600} =$   
487  $\sim 0.6$ ) in LB broth containing ampicillin (100  $\mu$ g/mL), and cfu calculated by serially diluting.  
488 Approximately  $5 \times 10^5$  cfu (100  $\mu$ l) each mid-log culture were added to wells of a 24 well  
489 plate containing differentiated Chang cells as described previously (23). Six wells were used  
490 per strain per experiment. Following addition of BL21, plates were incubated at 37°C for 2  
491 hours. Following incubation, supernatant was removed, and non-adherent cells removed by  
492 gentle washing with 1x PBS four times. Adherent cells were released by incubating with  
493 0.05% Trypsin in 1x PBS for 10mins at room-temperature. Adherent bacteria were quantified  
494 by serial dilution and plating. Percent adherence was calculated as the number of adherent cfu  
495 in relation to the total input cfu per strain. Student's t-test was carried out using total number  
496 of each output and comparing to wild-type cells. All data (total cfu and percent adherence) is  
497 presented as Supplementary Data 1.

498

#### 499 *Modelling interaction of HiaBD1 with 2-6 SLN*

500 Docking of 2-6 SLN to HiaBD1 was performed using the AutoDock Vina protocol (57) that  
501 has the highest scoring power among commercial and academic molecular docking programs  
502 (58) and is implemented in the YASARA Structure molecular modelling package (Ver.  
503 16.46) (59). The docking experiment was set up by using the X-ray crystal structure of  
504 HiaBD1 (pdb code 1S7M (22) with a box centered D620 using a grid size of 50 Å × 50 Å 50  
505 Å (x, y, z) covering chain C. A total number of 25 Vina docking runs were performed. The  
506 3D topology of the 2-6 SLN glycan was generated using the carbohydrate builder available at  
507 GLYCAM-Web server (<http://glycam.org>) (60).

508

509

510

## 511 **Acknowledgements**

512 Work was funded by the Australian National Health and Medical Research Council  
513 (NHMRC) Program Grant 1071659 and Principal Research Fellowship 1138466 to MPJ,  
514 Project Grant 1099279 to JMA, an Australian Research Council Discovery Project  
515 180100976 to JMA, a Garnett Passe and Rodney Williams Grant-in-Aid (Supplementation)  
516 to JMA, and a National Institutes of Health (NIH; USA) R01 Grant DC015688 to LOB and  
517 MPJ. We thank Patrick Azzari for a critical readthrough of, and valuable input to, the  
518 manuscript.

## 519 References

- 520 1. Haggard M. 2008. Otitis media: prospects for prevention. *Vaccine* 26 Suppl 7:G20-4.
- 521 2. Johnson RH. 1988. Community-acquired pneumonia: etiology, diagnosis, and  
522 treatment. *Clin Ther* 10:568-73.
- 523 3. Sethi S, Murphy TF. 2008. Infection in the pathogenesis and course of chronic  
524 obstructive pulmonary disease. *N Engl J Med* 359:2355-65.
- 525 4. Monasta L, Ronfani L, Marchetti F, Montico M, Vecchi Brumatti L, Bavcar A,  
526 Grasso D, Barbiero C, Tamburlini G. 2012. Burden of Disease Caused by Otitis  
527 Media: Systematic Review and Global Estimates. *PLOS ONE* 7:e36226.
- 528 5. A.A.P. 2004. Diagnosis and management of acute otitis media. *Pediatrics* 113:1451-  
529 65.
- 530 6. Alsarraf R, Jung CJ, Perkins J, Crowley C, Alsarraf NW, Gates GA. 1999. Measuring  
531 the indirect and direct costs of acute otitis media. *Arch Otolaryngol Head Neck Surg*  
532 125:12-8.
- 533 7. Heinz E. 2018. The return of Pfeiffer's bacillus: Rising incidence of ampicillin  
534 resistance in *Haemophilus influenzae*. *Microbial genomics* 4:e000214.
- 535 8. Langereis JD, de Jonge MI. 2015. Invasive Disease Caused by Nontypeable  
536 *Haemophilus influenzae*. *Emerg Infect Dis* 21:1711-8.
- 537 9. Edwards JL, Apicella MA. 2005. I-domain-containing integrins serve as pilus  
538 receptors for *Neisseria gonorrhoeae* adherence to human epithelial cells. *Cell*  
539 *Microbiol* 7:1197-211.
- 540 10. Novotny LA, Bakaletz LO. 2016. Intercellular adhesion molecule 1 serves as a  
541 primary cognate receptor for the Type IV pilus of nontypeable *Haemophilus*  
542 *influenzae*. *Cell Microbiol* 18:1043-55.
- 543 11. Hanson MS, Brinton CC, Jr. 1988. Identification and characterization of *E. coli* type-1  
544 pilus tip adhesion protein. *Nature* 332:265-8.
- 545 12. Benz I, Schmidt MA. 2011. Structures and functions of autotransporter proteins in  
546 microbial pathogens. *Int J Med Microbiol* 301:461-8.
- 547 13. Grijpstra J, Arenas J, Rutten L, Tommassen J. 2013. Autotransporter secretion:  
548 varying on a theme. *Res Microbiol* 164:562-82.
- 549 14. Henderson IR, Navarro-Garcia F, Desvaux M, Fernandez RC, Ala'Aldeen D. 2004.  
550 Type V protein secretion pathway: the autotransporter story. *Microbiol Mol Biol Rev*  
551 68:692-744.
- 552 15. Spahich NA, St. Geme I, Joseph W. 2011. Structure and function of the *Haemophilus*  
553 *influenzae* autotransporters. *Frontiers in Cellular and Infection Microbiology* 1.
- 554 16. Barenkamp SJ, St Geme JW, 3rd. 1996. Identification of a second family of high-  
555 molecular-weight adhesion proteins expressed by non-typable *Haemophilus*  
556 *influenzae*. *Mol Microbiol* 19:1215-23.
- 557 17. St Geme JW, 3rd, Kumar VV, Cutter D, Barenkamp SJ. 1998. Prevalence and  
558 distribution of the hmw and hia genes and the HMW and Hia adhesins among  
559 genetically diverse strains of nontypeable *Haemophilus influenzae*. *Infect Immun*  
560 66:364-8.
- 561 18. St Geme JW, Falkow S, Barenkamp SJ. 1993. High-molecular-weight proteins of  
562 nontypable *Haemophilus influenzae* mediate attachment to human epithelial cells.  
563 *Proceedings of the National Academy of Sciences* 90:2875-2879.
- 564 19. St Geme JW. 1994. The HMW1 adhesin of nontypeable *Haemophilus influenzae*  
565 recognizes sialylated glycoprotein receptors on cultured human epithelial cells.  
566 *Infection and Immunity* 62:3881-3889.

- 567 20. **Atack JM**, Day CJ, Poole J, Brockman KL, Bakaletz LO, Barenkamp SJ, Jennings  
568 MP. 2018. The HMW2 adhesin of non-typeable *Haemophilus influenzae* is a human-  
569 adapted lectin that mediates high-affinity binding to 2-6 linked N-acetylneuraminic  
570 acid glycans. *Biochem Biophys Res Commun* doi:10.1016/j.bbrc.2018.06.126.
- 571 21. Shinya K, Ebina M, Yamada S, Ono M, Kasai N, Kawaoka Y. 2006. Influenza virus  
572 receptors in the human airway. *Nature* 440:435.
- 573 22. Yeo HJ, Cotter SE, Laarmann S, Juehne T, St Geme JW, Waksman G. 2004.  
574 Structural basis for host recognition by the *Haemophilus influenzae* Hia  
575 autotransporter *The EMBO Journal* 23:1245-1256.
- 576 23. Atack JM, Winter LE, Jurcisek JA, Bakaletz LO, Barenkamp SJ, Jennings MP. 2015.  
577 Selection and counter-selection of Hia expression reveals a key role for phase-  
578 variable expression of this adhesin in infection caused by non-typeable *Haemophilus*  
579 *influenzae*. *J Infect Dis* 212:645-53.
- 580 24. Laarmann S, Cutter D, Juehne T, Barenkamp SJ, St Geme JW. 2002. The  
581 *Haemophilus influenzae* Hia autotransporter harbours two adhesive pockets that  
582 reside in the passenger domain and recognize the same host cell receptor. *Molecular*  
583 *Microbiology* 46:731-743.
- 584 25. Brockman KL, Azzari PN, Branstool MT, Atack JM, Schulz BL, Jen FE-C, Jennings  
585 MP, Bakaletz LO. 2018. Epigenetic Regulation Alters Biofilm Architecture and  
586 Composition in Multiple Clinical Isolates of Nontypeable *Haemophilus influenzae*.  
587 *mBio* 9.
- 588 26. Varki NM, Varki A. 2007. Diversity in cell surface sialic acid presentations:  
589 implications for biology and disease. *Laboratory Investigation* 87:851.
- 590 27. Ng PSK, Day CJ, **Atack JM**, Hartley-Tassell LE, Winter LE, Marshanski T, Padler-  
591 Karavani V, Varki A, Barenkamp SJ, Apicella MA, Jennings MP. 2019. Nontypeable  
592 *Haemophilus influenzae* Has Evolved Preferential Use of N-Acetylneuraminic Acid  
593 as a Host Adaptation. *mBio* 10.
- 594 28. Baum LG, Paulson JC. 1990. Sialyloligosaccharides of the respiratory epithelium in  
595 the selection of human influenza virus receptor specificity. *Acta Histochem Suppl*  
596 40:35-8.
- 597 29. Couceiro JNSS, Paulson JC, Baum LG. 1993. Influenza virus strains selectively  
598 recognize sialyloligosaccharides on human respiratory epithelium; the role of the host  
599 cell in selection of hemagglutinin receptor specificity. *Virus Research* 29:155-165.
- 600 30. Matrosovich MN, Matrosovich TY, Gray T, Roberts NA, Klenk H-D. 2004. Human  
601 and avian influenza viruses target different cell types in cultures of human airway  
602 epithelium. *Proceedings of the National Academy of Sciences of the United States of*  
603 *America* 101:4620-4624.
- 604 31. Connor RJ, Kawaoka Y, Webster RG, Paulson JC. 1994. Receptor specificity in  
605 human, avian, and equine H2 and H3 influenza virus isolates. *Virology* 205:17-23.
- 606 32. Matrosovich M, Tuzikov A, Bovin N, Gambaryan A, Klimov A, Castrucci MR,  
607 Donatelli I, Kawaoka Y. 2000. Early Alterations of the Receptor-Binding Properties  
608 of H1, H2, and H3 Avian Influenza Virus Hemagglutinins after Their Introduction  
609 into Mammals. *Journal of Virology* 74:8502-8512.
- 610 33. Ng PS, Böhm R, Hartley-Tassell LE, Steen JA, Wang H, Lukowski SW, Hawthorne  
611 PL, Trezise AE, Coloe PJ, Grimmond SM, Haselhorst T, von Itzstein M, Paton AW,  
612 Paton JC, Jennings MP. 2014. Ferrets exclusively synthesize Neu5Ac and express  
613 naturally humanized influenza A virus receptors. *Nat Commun* 5:5750.
- 614 34. Rudd JM, Ashar HK, Chow VT, Teluguakula N. 2016. Lethal Synergism between  
615 Influenza and *Streptococcus pneumoniae*. *Journal of infectious pulmonary diseases*  
616 2:10.16966/2470-3176.114.



- 617 35. Nita-Lazar M, Banerjee A, Feng C, Amin MN, Frieman MB, Chen WH, Cross AS,  
618 Wang LX, Vasta GR. 2015. Desialylation of airway epithelial cells during influenza  
619 virus infection enhances pneumococcal adhesion via galectin binding. *Mol Immunol*  
620 65:1-16.
- 621 36. Morens DM, Taubenberger JK, Fauci AS. 2008. Predominant role of bacterial  
622 pneumonia as a cause of death in pandemic influenza: implications for pandemic  
623 influenza preparedness. *The Journal of infectious diseases* 198:962-970.
- 624 37. Rynda-Apple A, Robinson KM, Alcorn JF. 2015. Influenza and Bacterial  
625 Superinfection: Illuminating the Immunologic Mechanisms of Disease. *Infection and*  
626 *immunity* 83:3764-3770.
- 627 38. Slinger R, Chan F, Ferris W, Yeung SW, St Denis M, Gaboury I, Aaron SD. 2006.  
628 Multiple combination antibiotic susceptibility testing of nontypeable *Haemophilus*  
629 *influenzae* biofilms. *Diagn Microbiol Infect Dis* 56:247-53.
- 630 39. Juneau RA, Pang B, Weimer KE, Armbruster CE, Swords WE. 2011. Nontypeable  
631 *Haemophilus influenzae* initiates formation of neutrophil extracellular traps. *Infect*  
632 *Immun* 79:431-8.
- 633 40. Drenkard E. 2003. Antimicrobial resistance of *Pseudomonas aeruginosa* biofilms.  
634 *Microbes Infect* 5:1213-9.
- 635 41. Belbase A, Pant ND, Nepal K, Neupane B, Baidhya R, Baidya R, Lekhak B. 2017.  
636 Antibiotic resistance and biofilm production among the strains of *Staphylococcus*  
637 *aureus* isolated from pus/wound swab samples in a tertiary care hospital in Nepal.  
638 *Annals of clinical microbiology and antimicrobials* 16:15-15.
- 639 42. Hall-Stoodley L, Hu FZ, Gieseke A, Nistico L, Nguyen D, Hayes J, Forbes M,  
640 Greenberg DP, Dice B, Burrows A, Wackym PA, Stoodley P, Post JC, Ehrlich GD,  
641 Kerschner JE. 2006. Direct Detection of Bacterial Biofilms on the Middle-Ear  
642 Mucosa of Children With Chronic Otitis Media. *JAMA* 296:202-211.
- 643 43. Starner TD, Zhang N, Kim G, Apicella MA, McCray PB, Jr. 2006. *Haemophilus*  
644 *influenzae* forms biofilms on airway epithelia: implications in cystic fibrosis. *Am J*  
645 *Respir Crit Care Med* 174:213-20.
- 646 44. Nizet V, Colina KF, Almquist JR, Rubens CE, Smith AL. 1996. A virulent  
647 nonencapsulated *Haemophilus influenzae*. *J Infect Dis* 173:180-6.
- 648 45. Barenkamp SJ, Bodor FF. 1990. Development of serum bactericidal activity  
649 following nontypable *Haemophilus influenzae* acute otitis media. *Pediatr Infect Dis J*  
650 9:333-9.
- 651 46. Herriott RM, Meyer EM, Vogt M. 1970. Defined nongrowth media for stage II  
652 development of competence in *Haemophilus influenzae*. *J Bacteriol* 101:517-24.
- 653 47. Winter LE, Barenkamp SJ. 2009. Antibodies specific for the Hia adhesion proteins of  
654 nontypeable *Haemophilus influenzae* mediate opsonophagocytic activity. *Clin*  
655 *Vaccine Immunol* 16:1040-1046.
- 656 48. Sambrook J, Fritsch EF, Maniatis T. 1989. *Molecular Cloning: A laboratory manual*,  
657 second edition. Cold Spring Harbour Laboratory Press.
- 658 49. Waespy M, Gbem TT, Elenschneider L, Jeck AP, Day CJ, Hartley-Tassell L, Bovin  
659 N, Tiralongo J, Haselhorst T, Kelm S. 2015. Carbohydrate recognition specificity of  
660 trans-sialidase lectin domain from *Trypanosoma congolense*. *PLoS Negl Trop Dis*  
661 9:e0004120.
- 662 50. Day CJ, Tran EN, Semchenko EA, Tram G, Hartley-Tassell LE, Ng PSK, King RM,  
663 Ulanovsky R, McAtamney S, Apicella MA, Tiralongo J, Morona R, Korolik V,  
664 Jennings MP. 2015. Glycan:glycan interactions: High affinity biomolecular  
665 interactions that can mediate binding of pathogenic bacteria to host cells. *Proceedings*  
666 *of the National Academy of Sciences* 112:E7266-E7275.

- 667 51. Mubaiwa TD, Hartley-Tassell LE, Semchenko EA, Day CJ, Jennings MP, Seib KL.  
668 2018. The Bexsero *Neisseria meningitidis* serogroup B vaccine antigen NHBA is a  
669 high-affinity chondroitin sulfate binding protein. *Sci Rep* 8:6512.
- 670 52. Tromp AT, Van Gent M, Abrial P, Martin A, Jansen JP, De Haas CJC, Van Kessel  
671 KPM, Bardoel BW, Kruse E, Bourdonnay E, Boettcher M, McManus MT, Day CJ,  
672 Jennings MP, Lina G, Vandenesch F, Van Strijp JAG, Jan Lebbink R, Haas PA,  
673 Henry T, Spaan AN. 2018. Human CD45 is an F-component-specific receptor for the  
674 staphylococcal toxin Panton-Valentine leukocidin. *Nat Microbiol*  
675 doi:10.1038/s41564-018-0159-x.
- 676 53. Poole J, Day CJ, Haselhorst T, Jen FE, Torres VJ, Edwards JL, Jennings MP. 2020.  
677 Repurposed Drugs That Block the *Gonococcus*-Complement Receptor 3 Interaction  
678 Can Prevent and Cure Gonococcal Infection of Primary Human Cervical Epithelial  
679 Cells. *mBio* 11.
- 680 54. Coll RC, Hill JR, Day CJ, Zamoshnikova A, Boucher D, Massey NL, Chitty JL,  
681 Fraser JA, Jennings MP, Robertson AAB, Schroder K. 2019. MCC950 directly targets  
682 the NLRP3 ATP-hydrolysis motif for inflammasome inhibition. *Nat Chem Biol*  
683 15:556-559.
- 684 55. Hartley-Tassell LE, Awad MM, Seib KL, Scarselli M, Savino S, Tiralongo J, Lyras  
685 D, Day CJ, Jennings MP. 2019. Lectin Activity of the TcdA and TcdB Toxins of  
686 *Clostridium difficile*. *Infect Immun* 87.
- 687 56. Jurcisek JA, Dickson AC, Bruggeman ME, Bakaletz LO. 2011. *In vitro* biofilm  
688 formation in an 8-well chamber slide. *Journal of Visualized Experiments*  
689 doi:10.3791/2481;pii: 2481. doi: 10.3791/2481.
- 690 57. Trott O, Olson AJ. 2010. AutoDock Vina: improving the speed and accuracy of  
691 docking with a new scoring function, efficient optimization, and multithreading. *J*  
692 *Comput Chem* 31:455-61.
- 693 58. Wang Z, Sun H, Yao X, Li D, Xu L, Li Y, Tian S, Hou T. 2016. Comprehensive  
694 evaluation of ten docking programs on a diverse set of protein-ligand complexes: the  
695 prediction accuracy of sampling power and scoring power. *Phys Chem Chem Phys*  
696 18:12964-75.
- 697 59. Krieger E, Koraimann G, Vriend G. 2002. Increasing the precision of comparative  
698 models with YASARA NOVA--a self-parameterizing force field. *Proteins* 47:393-  
699 402.
- 700 60. Woods RJ. 2005-2020. GLYCAM Web. <http://glycam.org>. Accessed  
701

702

703 **Table 1 – Surface Plasmon Resonance analysis of glycan binding affinity of BL21-Hia**  
704 **and purified recombinant Hia-BD1.**

|                     | <b>Hia</b>                   | <b>HiaBD1</b>               |
|---------------------|------------------------------|-----------------------------|
| <b>2-3 SLN-Ac</b>   | 2.03 $\mu\text{M} \pm 0.443$ | NCDI                        |
| <b>2-3 SLN-Gc</b>   | 10.1 $\mu\text{M} \pm 0.320$ | NCDI                        |
| <b>2-6 SLN-Ac</b>   | 185 nM $\pm 59.9$            | 64.9 nM $\pm 5.6$           |
| <b>2-6 SLN-Gc</b>   | 1.39 $\mu\text{M} \pm 0.411$ | 61.28 $\mu\text{M} \pm 9.1$ |
| <b>SLeX-Ac</b>      | NCDI                         | 19.9 $\mu\text{M} \pm 14.5$ |
| <b>SLeX-Gc</b>      | NCDI                         | NCDI                        |
| <b>LNnT</b>         | NCDI                         | NCDI                        |
| <b>2-3 Ac-SLNnT</b> | 2.03 $\mu\text{M} \pm 1.49$  | NCDI                        |
| <b>2-3 Gc-SLNnT</b> | 5.44 $\mu\text{M} \pm 1.11$  | NCDI                        |
| <b>LNT</b>          | NCDI                         | NCDI                        |
| <b>GM1-Ac</b>       | 9.61 $\mu\text{M} \pm 3.85$  | NCDI                        |
| <b>GM1-Gc</b>       | 10.3 $\mu\text{M} \pm 5.63$  | NCDI                        |

705

706 NCDI = No concentration dependent interaction. Indicates no binding between Hia  
707 expressing bacteria and the structure at a maximum concentration of 100  $\mu\text{M}$ .

708

709

710

711

712

713

714 **Table 2 - Surface Plasmon Resonance analysis of the blocking activity of peptides to**  
715 **interfer with the Hia : 2-6 SLN-Ac interaction.**

|                      | <b>Sequence</b>                        | <b>Block 2-6 SLN-Ac</b> |
|----------------------|----------------------------------------|-------------------------|
| <b>p15</b>           | DNLTQND <b>DA</b> YKGLT                | 54% ± 6.9               |
| <b>p16</b>           | QN <b>DDA</b> YKGLTNLDEK               | 95% ± 4.8               |
| <b>p17</b>           | YKGLTNLDEK <b>GT</b> DKQ               | 85% ± 8.6               |
| <b>p18</b>           | NLDEK <b>GT</b> DKQTPVVA               | 48% ± 1.7               |
| <b>p16/17 common</b> | YKGLTNLDEK                             | 95% ± 4.3               |
| <b>p16+17</b>        | QN <b>DDA</b> YKGLTNLDEK <b>GT</b> DKQ | 100% ± 2.5              |

716 **D618 and A620**

717

718 **Table 3 - Surface Plasmon Resonance analysis of glycan binding affinity of *E. coli* BL21**  
719 **expressing wild-type Hia and Hia isogenic mutants.**

|                              | <b>2-3 SLN-Ac</b> | <b>2-6 SLN-Ac</b> |
|------------------------------|-------------------|-------------------|
| <b>Hia wild-type</b>         | 2.47 μM ± 0.8     | 110 nM ± 3.0      |
| <b>Hia D618K</b>             | 842 nM ± 178      | 21 nM ± 1.0       |
| <b>Hia A620R</b>             | 3.04 μM ± 0.7     | NB                |
| <b>Hia D618K/A620 double</b> | 3.42 μM ± 1.2     | NB                |

720 NB: No binding using a OneStep injection at 10 μM, indicates a  $K_D$  above 10 μM.

721

722

723

724

725 **Figure 1 – molecular docking of Hia binding domain 1 (BD1) to 2-6 SLN.** The previously  
726 published structure of Hia BD1 was used (Yeo et al, 2004); PDB accession number 1S7M.  
727 Docking structure of 2,6SLN-Ac into Hia (22). **A)** solid surface of 1S7M and **B)** magnified  
728 region of 1S7M shown as secondary structure and bound 2-6 SLN-Ac. Key amino acids are  
729 labelled.

730

731 **Figure 2 – 2-6 SLN presence on Chang cells, and adherence of NTHi strain R2866**  
732 **expressing Hia to Chang cells.**

733 **A) 2-6 Sialyl-N-acetylactosamine expressed on the surface of Chang cells.** Upper panel,  
734 top-down view of 2-6 SLN distribution on Chang cells or cells pre-treated with  
735 neuraminidase. SNAi shown in white, phalloidin shown in red, nuclear DNA shown in blue.  
736 Scale bar, 25  $\mu$ m. Lower panel, representative side view of an optical section through SNAi  
737 labelled Chang cells. SNAi shown in white, nuclear DNA shown in blue; **B) Chang cell**  
738 **R2866 adherence.** Adherence of wild type R2866 expressing Hia (*hia+*) and the R2866  
739 *hia::tet* mutant to Chang cells. Left panels, Chang cell monolayer with phalloidin shown in  
740 red, nuclear DNA shown in blue. Middle panels, distribution of strain R2866 mutants that  
741 constitutively express GFP, shown in green. Bacteria that express Hia (*hia+*) bound markedly  
742 better to Chang cells than those that do not express Hia (*hia::tet*). Right panels, merged  
743 images that shows distribution of strain R2866 mutants across the surface of the Chang  
744 cells. Scale bar, 100  $\mu$ m.

745

746 **Figure 3 - Percent adherence to Chang cells of *E. coli* BL21 strains expressing wild-type**  
747 **Hia or isogenic mutant variants.** Percent adherence of each strain is calculated as adherent  
748 cfu following 2 hrs incubation / total input cfu. All raw data is presented in Supplementary

749 Data 1. \* = P-value = <0.005. NSD = no significant difference. P-values calculated using  
750 Student's t-test

751

752 **Figure 4 – biofilm formation by NTHi strains R2866 and strain 11**

753 Representative orthogonal image renderings of biofilm formation by NTHI strain R2866 and  
754 strain 11 *hia::tet* and *hia+* biofilms. Scale bars, 100  $\mu$ m. Biomass, average thickness and  
755 roughness of *hia::tet* and *hia+* biofilms grown for 24 hrs were analyzed by COMSTAT2 and  
756 values are shown as mean  $\pm$  standard error of the mean. \*p < 0.05, \*\*p < 0.01, \*\*\*\*p <  
757 0.0001, student's t-test. Average percent area occupied by bacteria at each individual 1  $\mu$ m  
758 optical section ('layer') were determined. Dashed lines indicate standard error of the mean.

759

760 **Figure 5 – illustration showing distribution of 2-6 SLN and 2-3 SLN in human airway.**

761 Hia and HMW2 both bind 2-6 SLN with high affinity, with both showing a very high  
762 preference for the human specific sialic acid Neu5Ac (2-6 SLN-Ac) over Neu5Gc (2-6 SLN-  
763 Gc). This means NTHi strains expressing either Hia or HMW2 are able to colonise the entire  
764 respiratory tract (upper in red, lower in blue). HMW1 preferentially binds 2-3 SLN, and with  
765 no affinity for Neu5Ac over Neu5Gc, which means NTHi strains only expressing HMW1  
766 may have a preference for the lower respiratory tract (blue). Schematic diagram taken from  
767 GetDrawings.com ([http://getdrawings.com/respiratory-system-with-label-  
768 drawing#respiratory-system-with-label-drawing-13.jpg](http://getdrawings.com/respiratory-system-with-label-drawing#respiratory-system-with-label-drawing-13.jpg)) under a CC BY-NC 4.0 Licence.

769

770 **Supplementary Figure 1 A)** Western blot showing the over-expression of wild-type Hia in  
771 *E. coli* BL21; and **B)** Whole cell ELISA showing that Hia expressed in *E. coli* BL21 is  
772 located on the bacterial cell surface

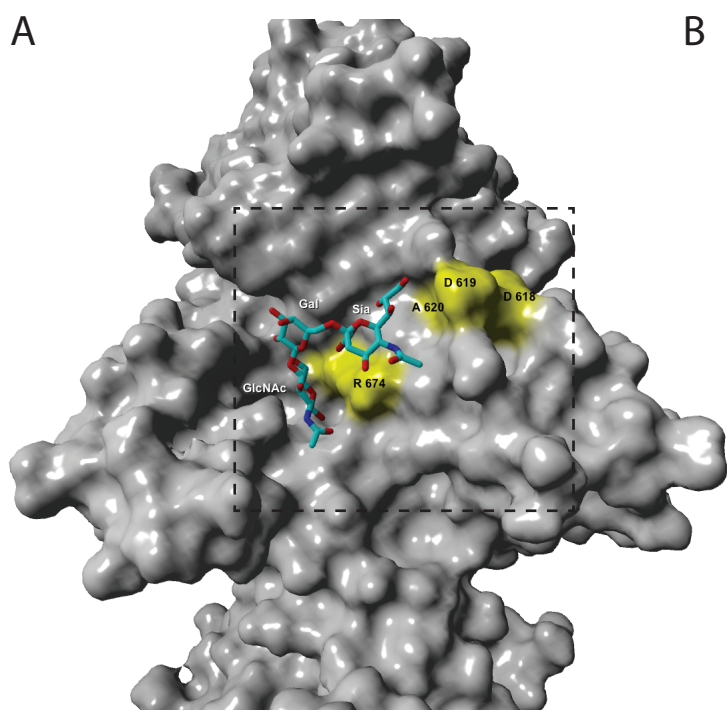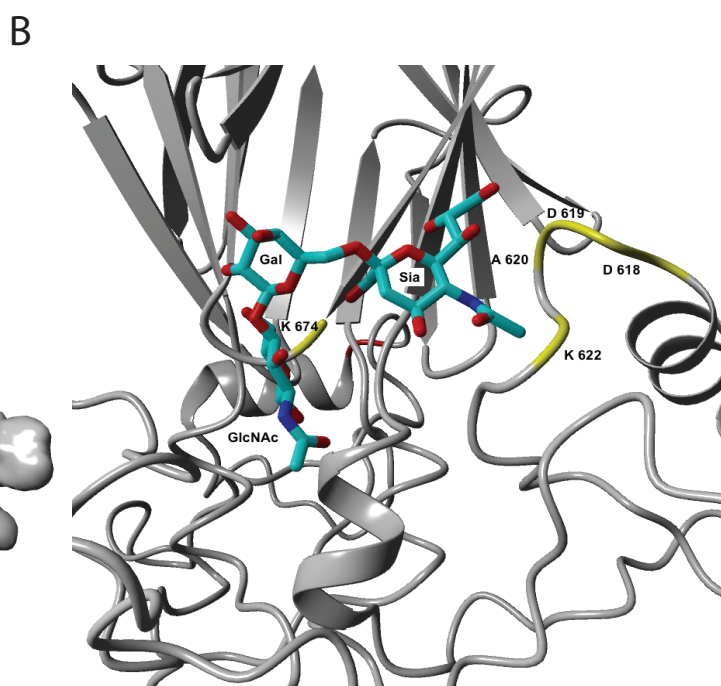

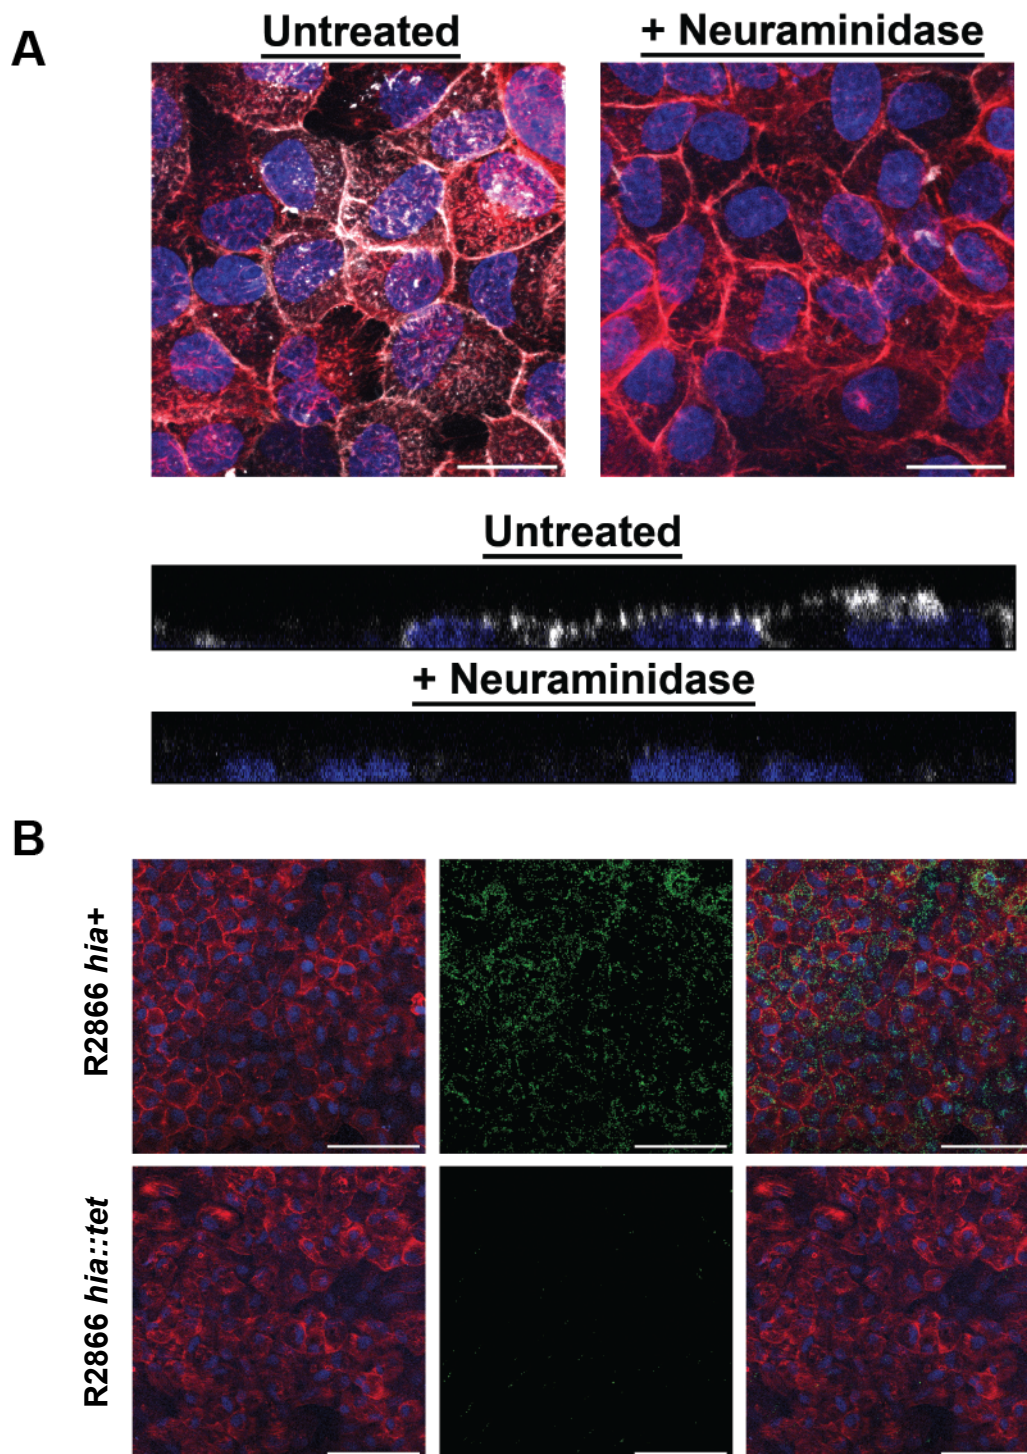



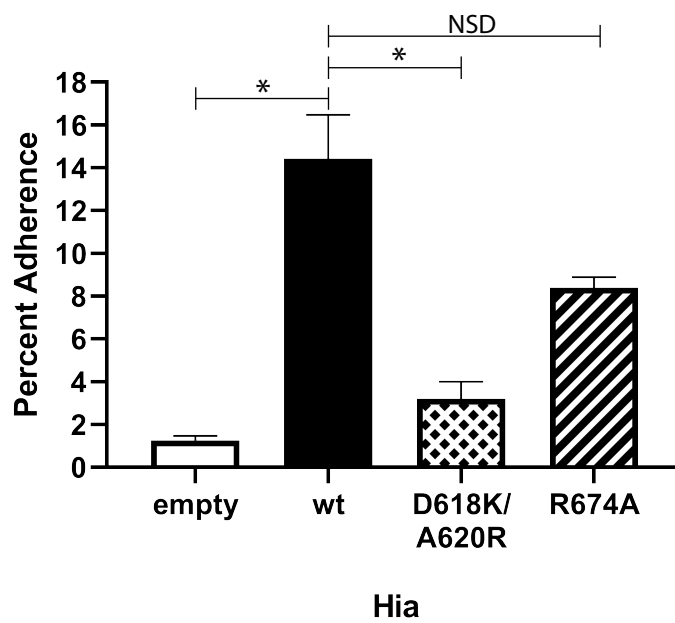

A

R2866 *hia::tet*R2866 *hia+*

bioRxiv preprint doi: <https://doi.org/10.1101/2020.05.09.284038>; this version posted May 9, 2020. The copyright holder for this preprint (which was not certified by peer review) is the author/funder, who has granted bioRxiv a license to display the preprint in perpetuity. It is made available under aCC-BY-NC-ND 4.0 International license.

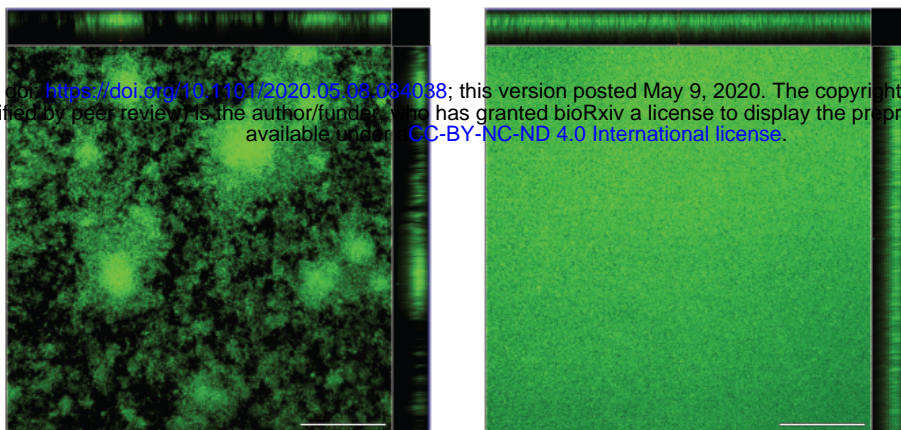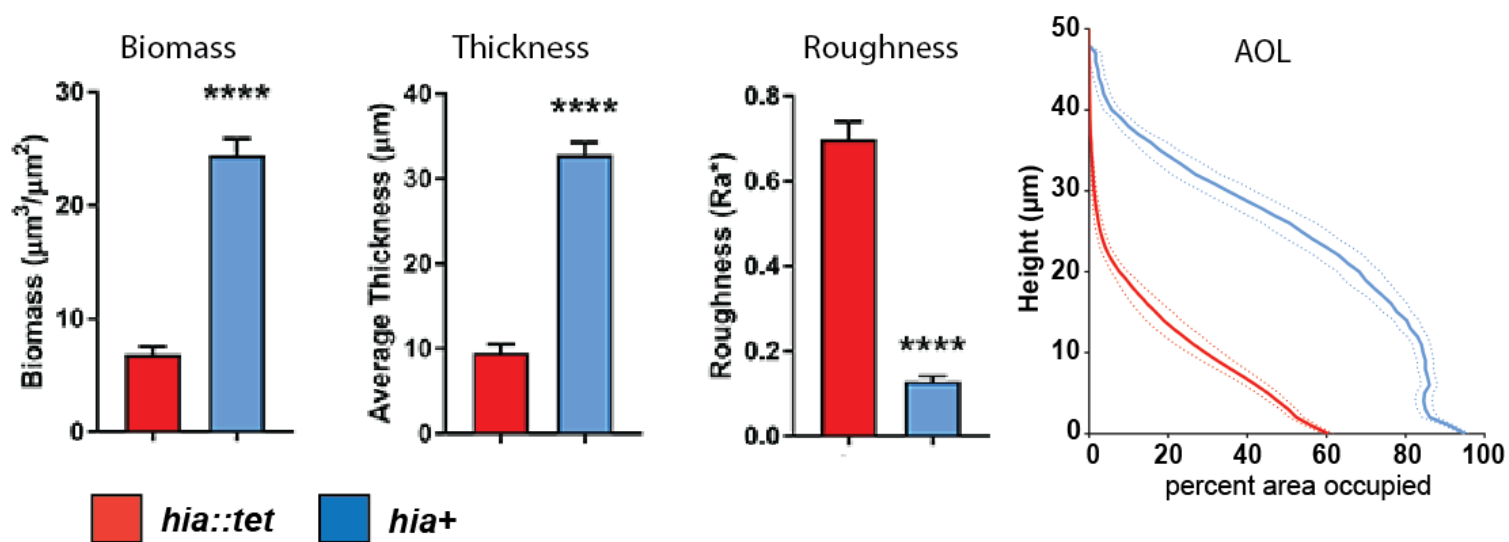

B

strain11 *hia::tet*strain11 *hia+*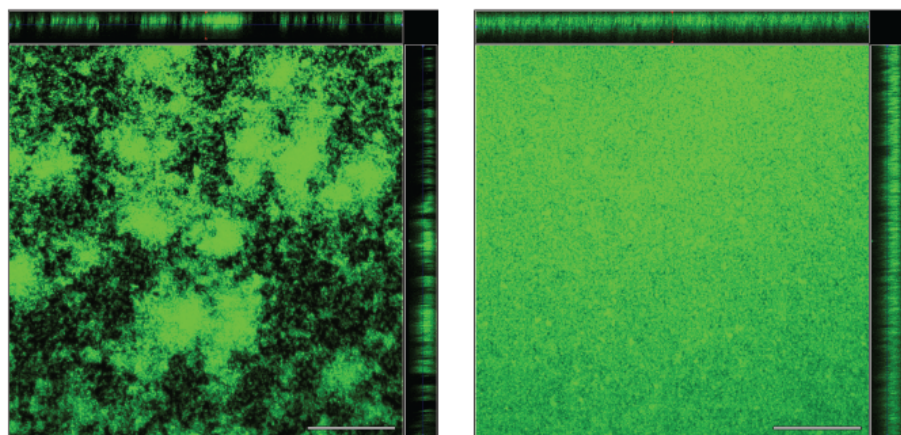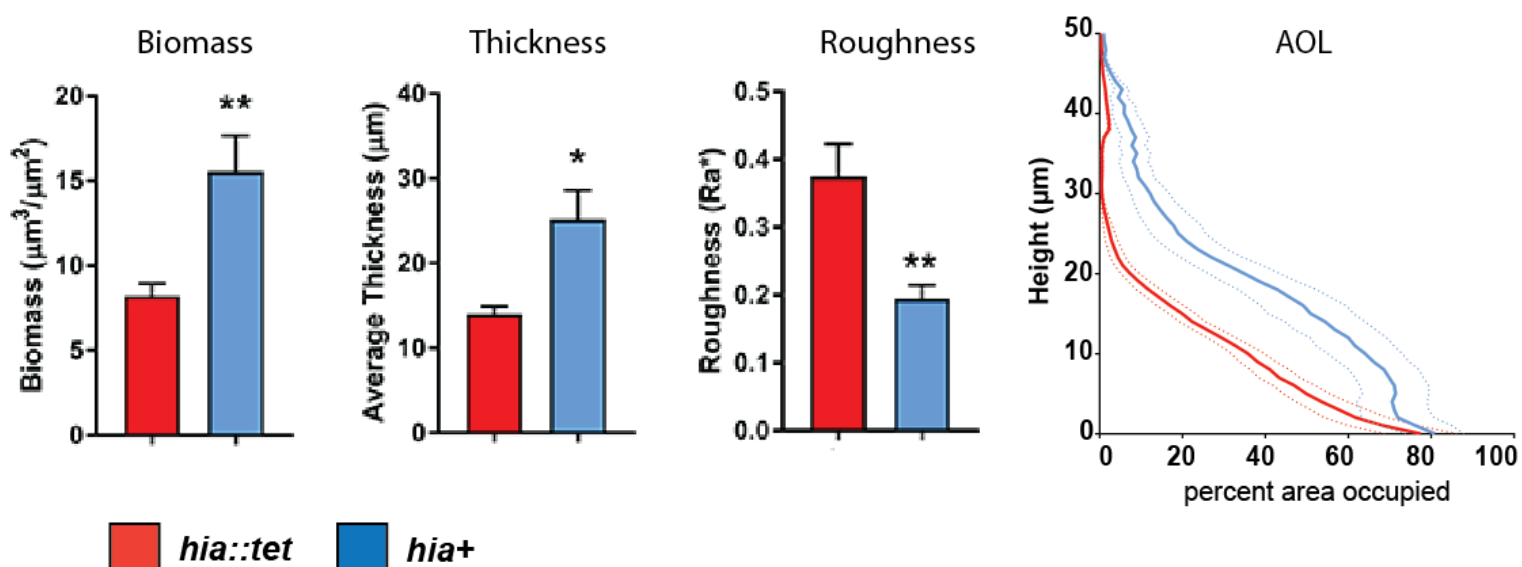

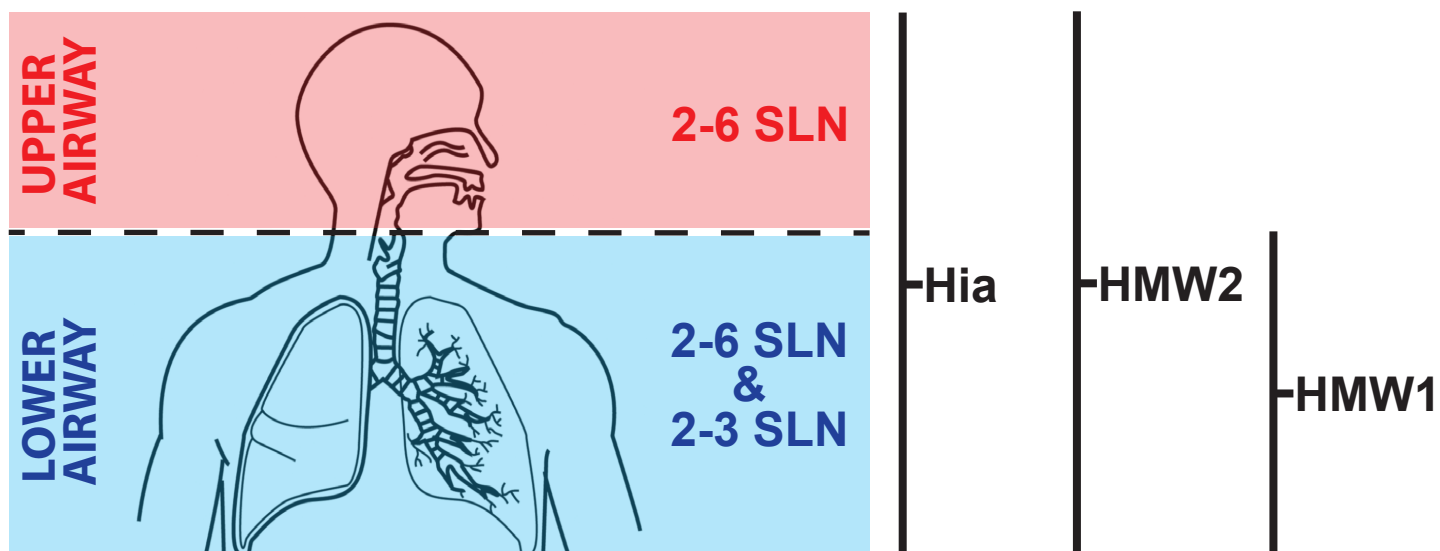

Source: https://www.biorxiv.org/content/10.1101/2020.05.08.084038v1.full.pdf
