# Supplementary material for: The non-typeable Haemophilus influenzae major adhesin Hia is a dual function lectin that binds to human-specific respiratory tract sialic acid glycan receptors
Source: bioRxiv or medRxiv preprint supplement (doi:10.1101/2020.05.08.084038), 2020-05-08

A)

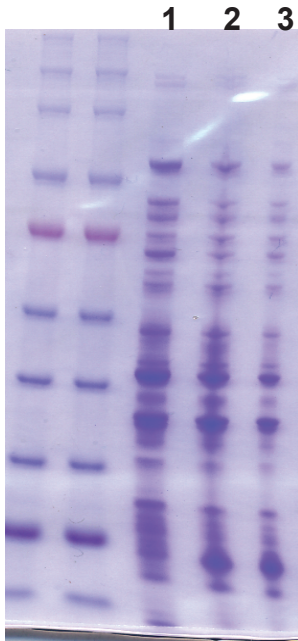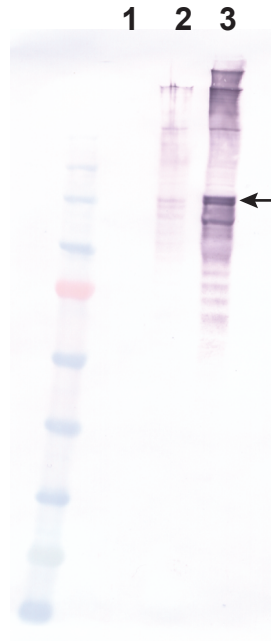

1. BL21 only
2. BL21 pET15b::Hia uninduced
3. BL21 pET15b::Hia induced

B)

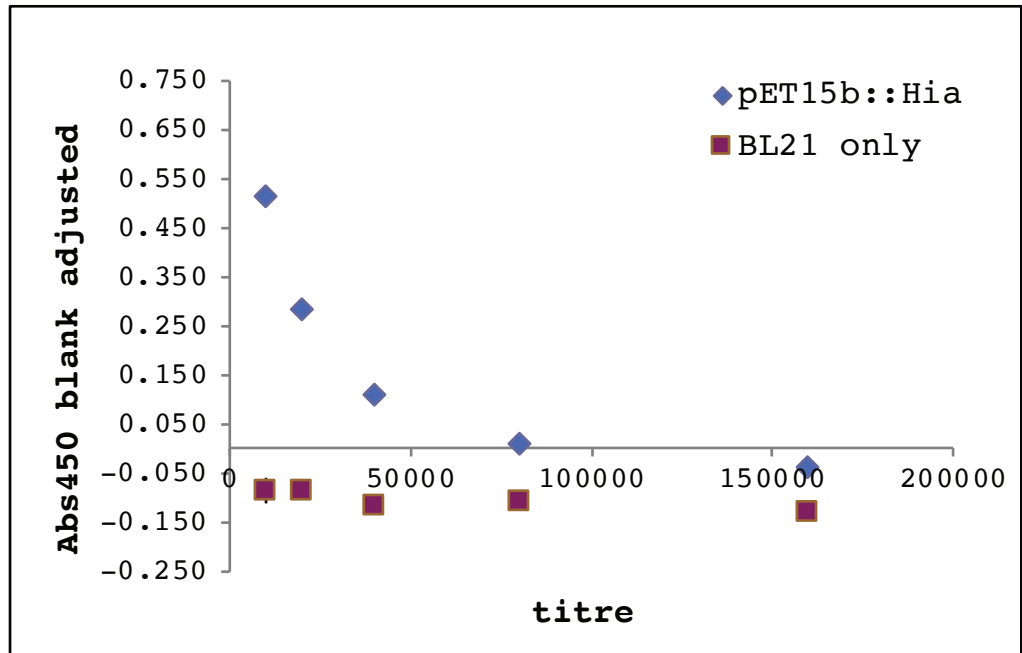

Supplement: Supplementary file [file media-3.pdf]
